# Supplementary material for: Polystyrene Nanoplastics Can Alter the Toxicological Effects of Simvastatin on Danio rerio
Source: PubMed Central journal article supplement (PMC7996764; doi:10.3390/toxics9030044), 2021-02-26
Supplement: toxics-09-00044-s001.pdf [file toxics-09-00044-s001.pdf]

# Supplementary Material: Polystyrene Nanoplastics Can Alter the Toxicological Effects of Simvastatin on *Danio rerio*

Angela Barreto, Joana Santos, Mónica J.B. Amorim and Vera L. Maria

## S1. Materials and Methods

**Table S1.** Reference/calculated data of the selected functionalized polystyrene nanoplastics dispersion from the certificated sheet of the Bangs Laboratories, Inc.

| Calculated Data                   | Values                 |
|-----------------------------------|------------------------|
| Density (g/cm <sup>3</sup> )      | 1.06                   |
| Number of nanospheres/g           | $8.341 \times 10^{15}$ |
| Number of nanospheres/ml          | $8.346 \times 10^{13}$ |
| Surface area (μm <sup>2</sup> /g) | $9.434 \times 10^{13}$ |
| Solids content (%)                | 1                      |

The NPIs' uptake traceability characterization was made using embryos ( $n = 12$ ; 3 biological replicates per condition and per time of exposure) exposed to the same conditions (temperature, test duration, exposure concentrations and volume of test medium/embryo) used in the FET test design in a parallel additional experiment. However, the test ran in the dark (the glass Petri dishes were covered with aluminum foil to avoid contact with light and consequent fluorescence loss). The samples were collected at 24, 48, 72 and 96 h, under a stereomicroscope. The embryos/larvae were washed with distilled water, anesthetized with 4% tricaine (E10521, Sigma-Aldrich, Saint Louis, MO, USA) and mounted onto concave microscope slides with tricaine solution (4%), prior to observation with a fluorescence microscope (Axio Imager Z19, with AxioCam HR, Zeiss, White Plains, NY, USA). The filter used to analyze the green fluorescence was EGFP (excitation 450–490 nm, emission 500–550 nm).

## 2. Results

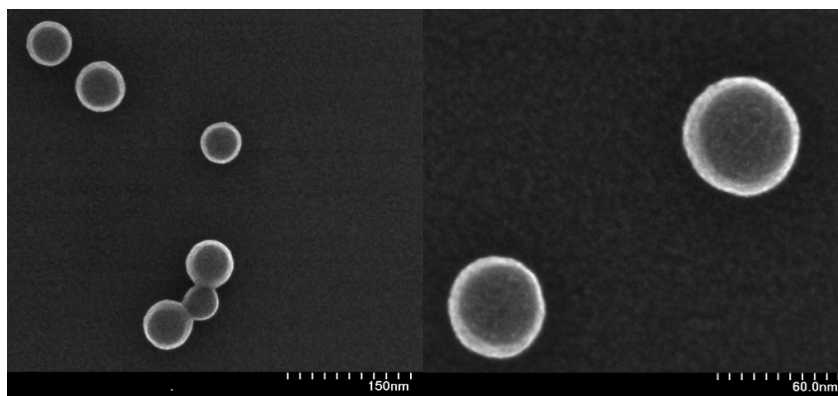

**Figure S1.** Scanning electron microscopy (SEM) images of the functionalized polystyrene nanoplastics stock dispersion (at 0.001%).

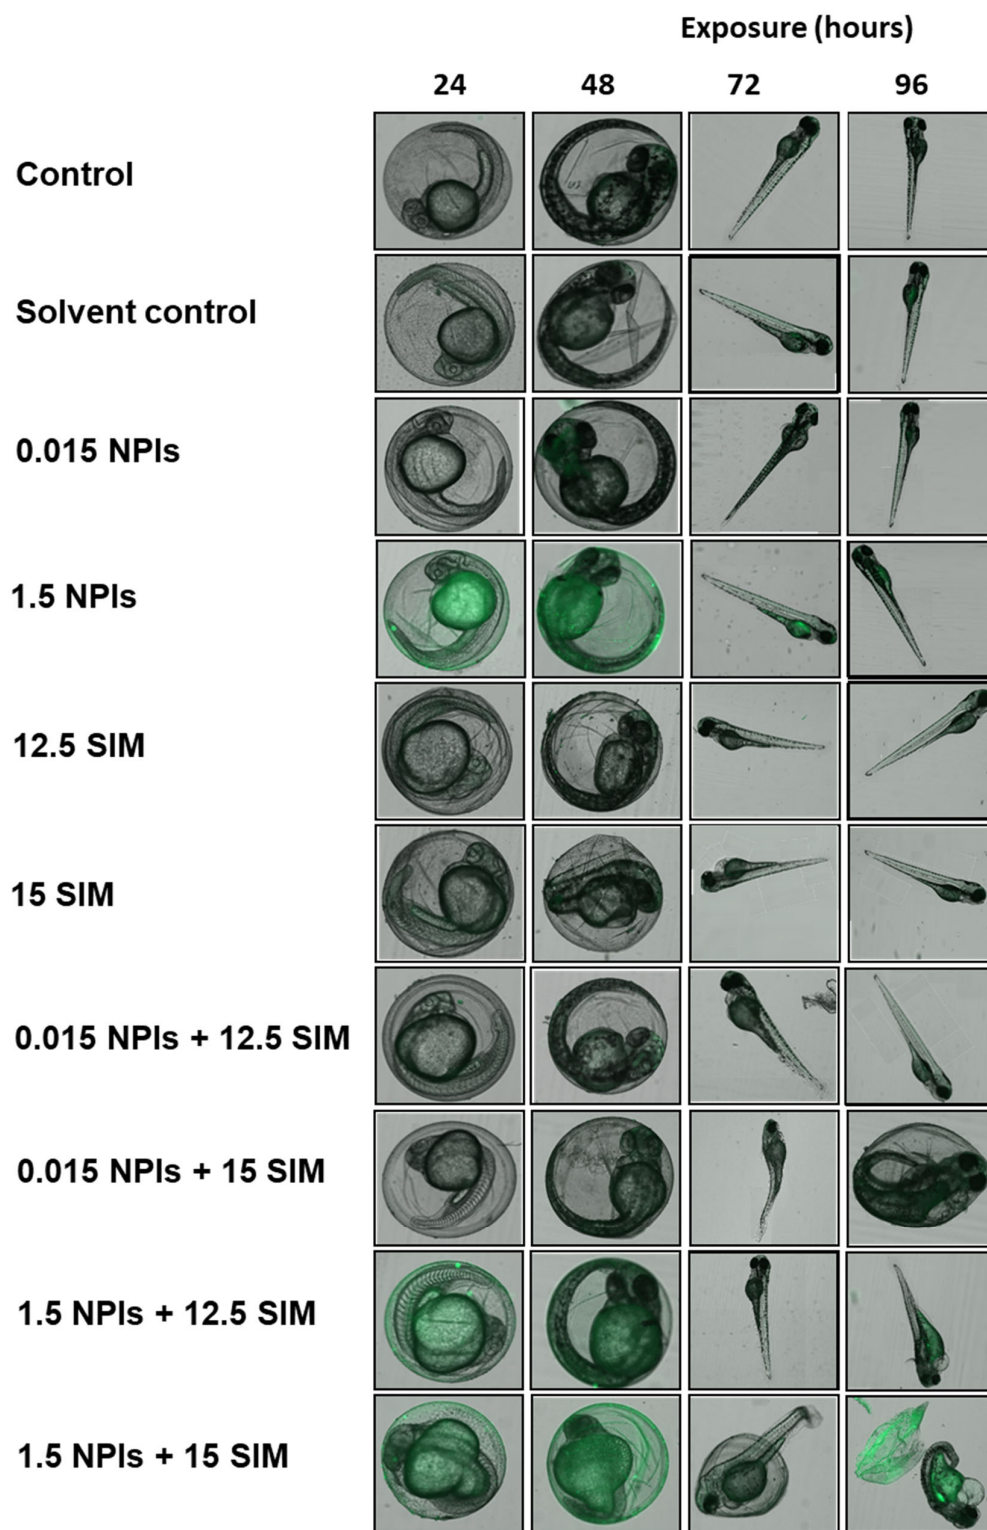

**Figure S2.** Schematic and microscopic visualization of embryo development of *Danio rerio* for 96 hours, when exposed to control, solvent control, single and dual combinations of simvastatin (SIM) and polystyrene nanoplastics (NPIs). Images resulted from the merge of two filters, brightfield and enhanced green fluorescence protein (EGFP). SIM: simvastatin; NPIs: nanoplastics; Single SIM exposures: 12.5 and 15  $\mu\text{g/L}$ ; Single NPIs concentrations: 0.015 and 1.5  $\text{mg/L}$ ; Dual combinations: 0.015  $\text{mg/L}$  NPIs + 12.5  $\mu\text{g/L}$  SIM; 0.015  $\text{mg/L}$  NPIs + 15  $\mu\text{g/L}$  SIM; 1.5  $\text{mg/L}$  NPIs + 12.5  $\mu\text{g/L}$  SIM; 1.5  $\text{mg/L}$  NPIs + 15  $\mu\text{g/L}$  SIM.
